# Supplementary material
Source: PubMed Central journal article supplement (PMC2688463)
Supplement: NIHMS91141-supplement-1_si_001.pdf [file NIHMS91141-supplement-1_si_001.pdf]

## Supporting Information

Structure-Based Design, Synthesis, Evaluation and Crystallographic Studies of  
Conformationally Constrained Smac Mimetics as Inhibitors of the X-linked  
Inhibitor of Apoptosis Protein (XIAP)

Haiying Sun<sup>+¶</sup>, Jeanne A. Stuckey<sup>^‡</sup>, Zaneta, Nikolovska-Coleska<sup>+¶</sup>, Dongguang Qin<sup>+¶</sup>, Jennifer  
L. Meagher<sup>‡</sup>, Su Qiu<sup>+¶</sup>, Jianfeng Lu<sup>+¶</sup>, Chao-Yie Yang<sup>+¶</sup>, Naoyuki Saito<sup>§</sup> and Shaomeng  
Wang<sup>+¶Δ#\*</sup>

Departments of <sup>+</sup>Internal Medicine, <sup>^</sup>Biological Chemistry, <sup>Δ</sup>Pharmacology, <sup>#</sup>Medicinal  
Chemistry, and <sup>§</sup>Radiation Oncology, <sup>¶</sup>Comprehensive Cancer Center, <sup>‡</sup>Life Sciences Institute,  
<sup>‡</sup>Biophysics Research Division, University of Michigan, Ann Arbor, MI 48109, USA

\* To whom correspondence should be addressed.

Phone: 734-615-0362.

Fax: 734-647-9647.

E-mail: shaomeng@umich.edu.

**Table S1.** Elemental Analysis data of new Smac mimetics containing the [8,5] bicyclic core structure.

| <b>Compounds</b> | <b>Formula</b>                                                |                                                    | <b>Elem. Anal. Required</b> | <b>Results</b>          |
|------------------|---------------------------------------------------------------|----------------------------------------------------|-----------------------------|-------------------------|
| <b>16</b>        | C <sub>27</sub> H <sub>34</sub> N <sub>4</sub> O <sub>3</sub> | 1.0HCl 1.0CF <sub>3</sub> COOH                     | C 56.81, H 5.92, N 9.14     | C 57.13, H 6.05, N 8.87 |
| <b>17</b>        | C <sub>28</sub> H <sub>36</sub> N <sub>4</sub> O <sub>3</sub> | 1.0HCl 2.0H <sub>2</sub> O                         | C 61.25, H 7.53, N 10.20    | C 61.10, H 7.39, N 9.99 |
| <b>18</b>        | C <sub>32</sub> H <sub>38</sub> N <sub>4</sub> O <sub>3</sub> | 1.0HCl 1.0CF <sub>3</sub> COOH 0.6H <sub>2</sub> O | C 59.36, H 6.04, N 8.14     | C 59.58, H 6.11, N 8.15 |
| <b>19</b>        | C <sub>32</sub> H <sub>38</sub> N <sub>4</sub> O <sub>3</sub> | 1.0HCl 1.0CF <sub>3</sub> COOH 0.8H <sub>2</sub> O | C 59.05, H 6.06, N 8.10     | C 59.12, H 6.09, N 8.16 |
| <b>20</b>        | C <sub>28</sub> H <sub>36</sub> N <sub>4</sub> O <sub>3</sub> | 1.0HCl 1.0CF <sub>3</sub> COOH                     | C 57.46, H 6.11, N 8.93     | C 57.34, H 6.27, N 8.79 |
| <b>21</b>        | C <sub>29</sub> H <sub>38</sub> N <sub>4</sub> O <sub>3</sub> | 1.0HCl 1.0CF <sub>3</sub> COOH                     | C 58.08, H 6.29, N 8.74     | C 58.02, H 6.29, N 8.60 |
| <b>22</b>        | C <sub>32</sub> H <sub>42</sub> N <sub>4</sub> O <sub>3</sub> | 1.0HCl 1.3H <sub>2</sub> O                         | C 65.08, H 7.78, N 9.49     | C 65.23, H 7.98, N 9.69 |
| <b>23</b>        | C <sub>32</sub> H <sub>42</sub> N <sub>4</sub> O <sub>4</sub> | 1.0HCl 2.5H <sub>2</sub> O                         | C 61.18, H 7.70, N 8.92     | C 61.12, H 7.55, N 8.86 |

|           |                      |                     |                         |                         |                         |
|-----------|----------------------|---------------------|-------------------------|-------------------------|-------------------------|
| <b>24</b> | $C_{27}H_{33}N_3O_4$ | 1.6H <sub>2</sub> O |                         | C 65.86, H 7.41, N 8.53 | C 66.02, H 7.19, N 8.18 |
| <b>25</b> | $C_{25}H_{36}N_4O_3$ | 1.0HCl              | 1.0CF <sub>3</sub> COOH | C 54.87, H 6.48, N 9.48 | C 54.89, H 6.50, N 9.22 |
| <b>26</b> | $C_{25}H_{36}N_4O_3$ | 1.0HCl              | 1.0CF <sub>3</sub> COOH | C 54.87, H 6.48, N 9.48 | C 54.67, H 6.49, N 9.26 |
| <b>27</b> | $C_{24}H_{34}N_4O_3$ | 1.0HCl              | 1.0CF <sub>3</sub> COOH | C 54.12, H 6.29, N 9.71 | C 54.20, H 6.42, N 9.67 |
